# Supplementary material for: Serratia marcescens-derived fluorescent carbon dots as a platform toward multi-mode bioimaging and detection of p-nitrophenol
Source: Royal Society of Chemistry journal article supplement (doi:10.1039/d0an01624a), 2020-10-30
Supplement: d0an01624a1.pdf [file d0an01624a1.pdf]

## ***Serratia marcescens*-derived fluorescent carbon dots as the platform toward multi-mode bioimaging and detection of *p*-nitrophenol**

Yafang Ding<sup>a#</sup>, Wenzhang Tan<sup>a#</sup>, Xiaodan Zheng<sup>a</sup>, Xiuling Ji<sup>a</sup>, Pengfei Song<sup>b</sup>, Limei Bao<sup>c</sup>, Chunting Zhang<sup>a</sup>, Junjie Shang<sup>a</sup>, Kunhao Qin<sup>a\*</sup>, Yunlin Wei<sup>a\*</sup>

a. Faculty of Life Science and Technology, Kunming University of Science and Technology, Kunming 650500, China

b. R&D Center, China Tobacco Yunnan Industrial Co., Ltd, Kunming 650091, China

c. Faculty of Science, Kunming University of Science and Technology, Kunming 650500, China

#. These authors have contributed equally to this work.

\*. Corresponding author: qinteddy@163.com; weiyunlin18@163.com.

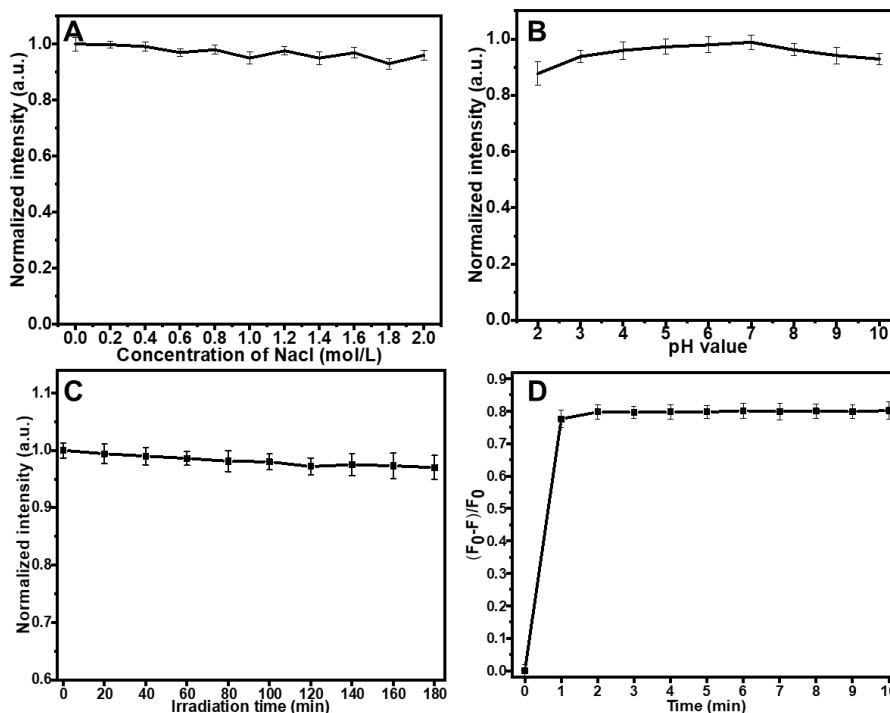

**Fig. S1** (A): Normalized fluorescence intensity of CDs-KMR3 in different NaCl concentrations ranging from 0 to 2 M. (B): The fluorescence intensity of CDs-KMR3 varying with the sample pH value from 2 to 10. (C): Normalized fluorescence intensity of CDs-KMR3 under UV (365 nm) irradiation for 3 h. (D): Effect of reaction time on

the detection of *p*-NP with CDs-KMR3.

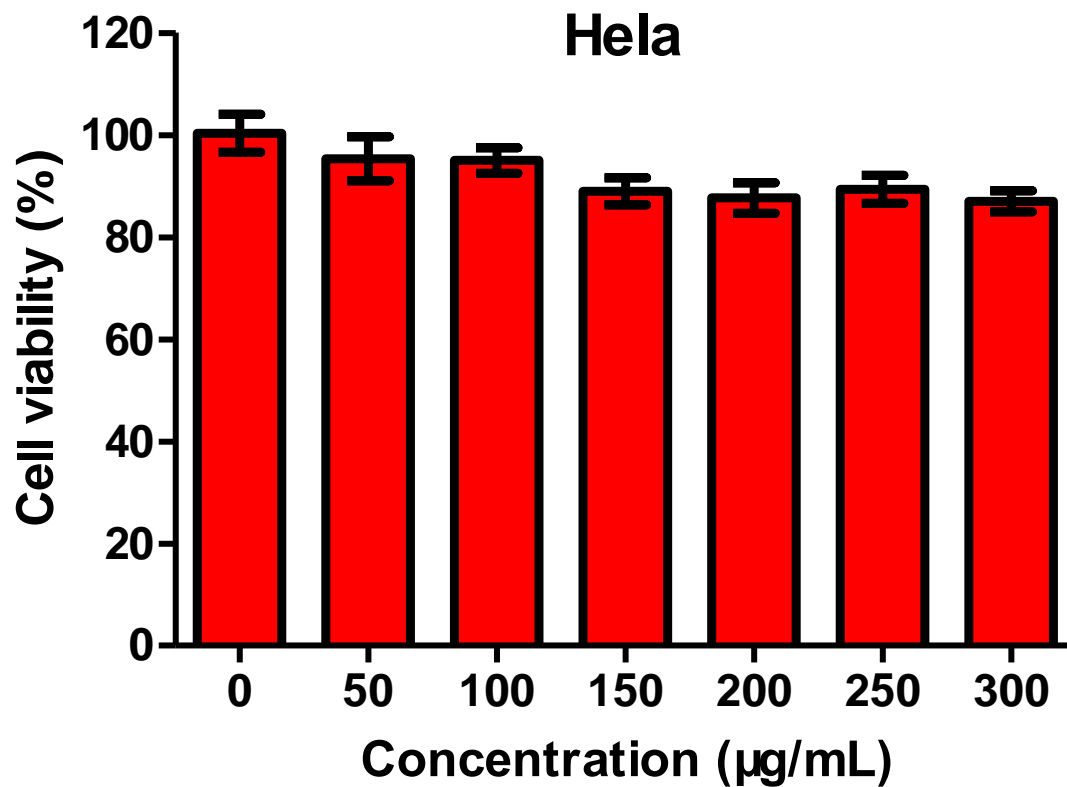

**Fig. S2** HeLa cell viability from MTT assays with different CDs-KMR3 concentration after 24 h incubation.

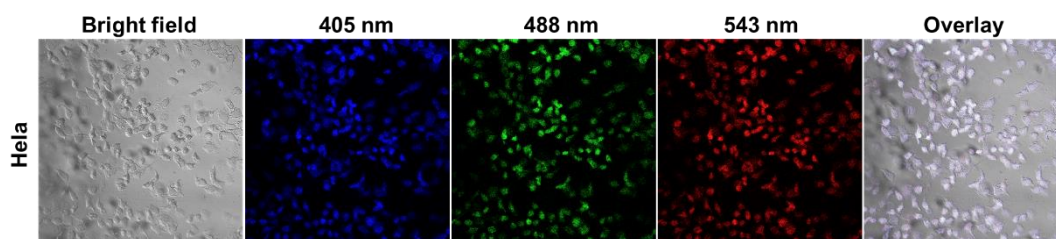

**Fig. S3** CLSM images of HeLa cells incubated with CDs-KMR3 under different excitation wavelengths.
